## 1    **Supplementary material**

2

### 3    **Supplementary Figure 1. Graphical representation of HR variability,**

4    **representative views at three different temperatures.** First column, Poincare plots.

5    The central point represents the mean NN interval, plotting each interbeat interval

6    against the subsequent interbeat interval. The ellipse represents the standard deviation

7    of interbeat intervals perpendicular (SD1, short term HR variability) and parallel

8    (SD2, long term HR variability) to the line of identity. Boundaries are set to identify

9    ectopic beats and data outliers (artefacts). As the BPT is approached, the dispersion

10   widens and eventually separates into clusters representing repetitive rhythm

11   sequences. Middle column, this can be seen in the period histogram, where a gradual

12   rightward expansion leads to a bimodal distribution. Right column, representative

13   ECG traces showing: top, regular rhythmicity of rested trout at low temperature (in this

14   case with a prominent T-wave); middle, appearance of a range of interbeat interval

15   durations; bottom, establishment of a different form of rhythmicity, in this case a long

16   beat followed by three shorter beats.

17

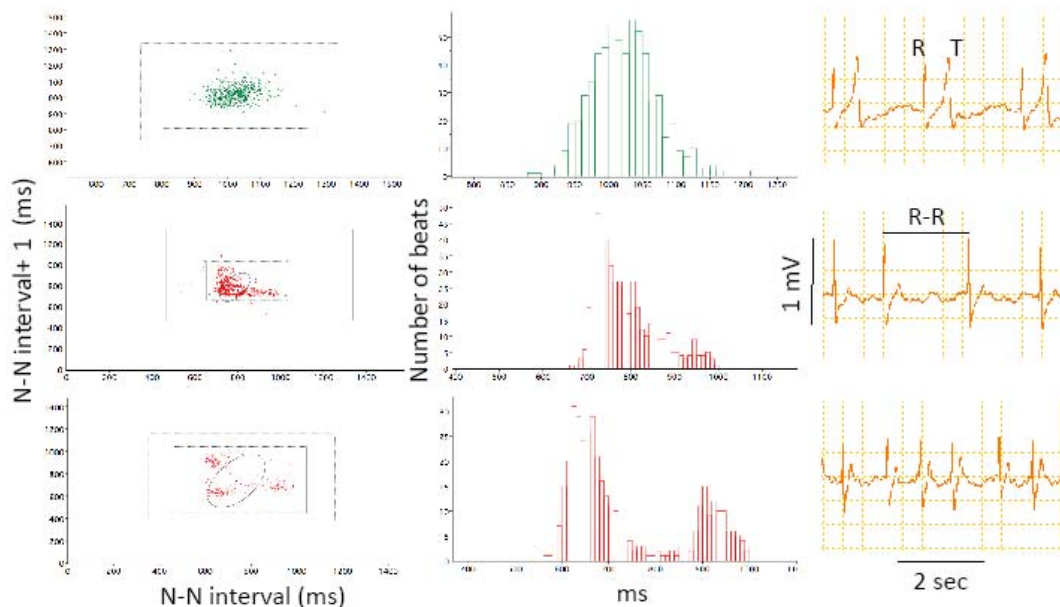

19 **Supplementary Figure 2. Frequency domain analysis. Individual cardiac cycle**  
20 **elements (heart rate, bpm; R-R interval, ms) plotted against defined temperature**  
21 **records (n=4, non-linear and linear least squares regression,  $\pm 95\%$  confidence**  
22 **intervals, respectively) from tachograms of 256 consecutive cycles.**

23

24

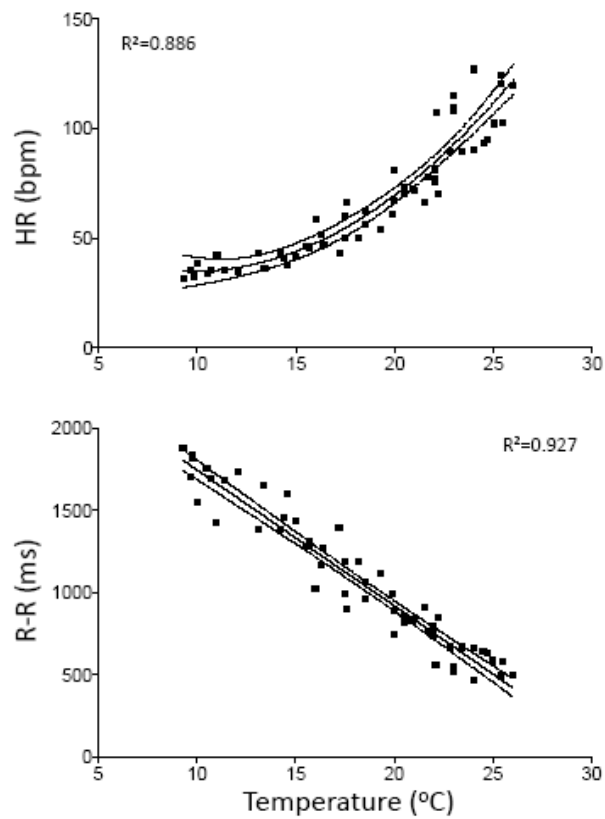

Source: https://cob.silverchair-cdn.com/cob/content_public/journal/jeb/217/2/10.1242_jeb.091272/4/jeb091272.pdf
